1 **Field evidence for manipulation of mosquito host selection by the human malaria parasite,**  
2 *Plasmodium falciparum*

3 Amélie Vantaux<sup>a,b</sup>, Franck Yao<sup>b</sup>, Domonbabele FdS Hien<sup>b</sup>, Edwige Guissou<sup>b</sup>, Bienvenue K. Yameogo<sup>b</sup>,  
4 Louis-Clément Gouagna<sup>a</sup>, Didier Fontenille<sup>a,d</sup>, François Renaud<sup>a</sup>, Frédéric Simard<sup>a</sup>, Carlo Costantini<sup>a</sup>,  
5 Frédéric Thomas<sup>a</sup>, Karine Mouline<sup>a,b,c</sup>, Benjamin Roche<sup>a,e</sup>, Anna Cohuet<sup>a</sup>, Kounbobr R. Dabiré<sup>b,c</sup>,  
6 Thierry Lefèvre<sup>a,b,c</sup>

7 <sup>a</sup> Maladies Infectieuses et Vecteurs: Ecologie, Génétique, Evolution et Contrôle (MIVEGEC), UMR IRD  
8 224-CNRS 5290-UM, Montpellier, France.

9 <sup>b</sup> Institut de Recherche en Sciences de la Santé (IRSS), Bobo-Dioulasso, Burkina Faso.

10 <sup>c</sup> Laboratoire mixte international sur les vecteurs (LAMIVECT), Bobo Dioulasso, Burkina Faso.

11 <sup>d</sup> Institut Pasteur in Cambodia, Phnom Penh, Cambodia.

12 <sup>e</sup> Unité de Modélisation Mathématique et Informatique des Systèmes complexes (UMMISCO), UMI  
13 IRD/UPMC209, Bondy, France

14

15 **Corresponding author:** AV: [amelie.vantaux@gmail.com](mailto:amelie.vantaux@gmail.com)

16 AV current address: Malaria Molecular Epidemiology Unit, Institut Pasteur in Cambodia, 5 Bd  
17 Monivong, PO Box 983, Phnom Penh 12 201, Cambodia

18

## 19 **Abstract**

20 Whether the malaria parasite *Plasmodium falciparum* can manipulate mosquito host choice in  
21 ways that enhance parasite transmission toward human is unknown. We assessed the influence of  
22 *P. falciparum* on the blood-feeding behaviour of three of its major vectors (*Anopheles coluzzii*,  
23 *An. gambiae* and *An. arabiensis*) in Burkina Faso. Host preferences assays using odor-baited  
24 traps revealed no effect of infection on mosquito long-range anthropophily. However, the  
25 identification of the blood meal origin of mosquitoes showed that females carrying sporozoites,  
26 the mature transmissible stage of the parasite, were 24% more anthropophagic than both females  
27 harbouring oocysts, the parasite immature stage, and uninfected individuals. Using a  
28 mathematical model, we further show that this increased anthropophagy in infectious females  
29 can have important epidemiological consequences with up to 123% increase in parasite  
30 transmission at low mosquito to human ratios. This increase in transmission potential highlights  
31 the importance of vector control tools targeting infectious females.

32

## 33 **Introduction**

34 There is mounting evidence that malaria parasites affect phenotypic traits of their vectors and  
35 hosts in ways that increase contacts between them, hence favouring parasite transmission (Hurd  
36 2003, Lefèvre and Thomas 2008, Koella 2005). In addition to increased vertebrate attractiveness  
37 to mosquito vectors (De Moraes et al. 2014, Cornet et al. 2013, Lacroix et al. 2005, Batista,  
38 Costa, and Silva 2014, Busula et al. 2017, Emami et al. 2017), another frequently reported  
39 parasite-induced change is the alteration of vector motivation and avidity to feed (Cator et al.  
40 2012, Stanczyk, Mescher, and De Moraes 2017). Mosquitoes infected with *Plasmodium*

41 sporozoites (the mosquito to human transmission stage) can indeed display increased (i) response  
42 to host odours (Rossignol, Ribeiro, and Spielman 1986, Cator et al. 2013), (ii) landing and biting  
43 activity (Rossignol, Ribeiro, and Spielman 1984, 1986, Wekesa, Copeland, and Mwangi 1992,  
44 Anderson, Koella, and Hurd 1999, Koella, Rieu, and Paul 2002, Smallegange et al. 2013), (iii)  
45 number of feeds (Koella, Sorensen, and Anderson 1998) and (iv) blood volume intake (Koella  
46 and Packer 1996, Koella, Sorensen, and Anderson 1998, Koella, Rieu, and Paul 2002). In  
47 contrast, mosquitoes infected with oocysts (the immature non-transmissible stage of the  
48 parasite), are less likely to attempt to feed (Anderson, Koella, and Hurd 1999, Koella, Rieu, and  
49 Paul 2002, Cator et al. 2013). Since biting is risky (e.g., host defensive behaviours can kill the  
50 vector and its parasite), reduced feeding attempts seems beneficial to the parasite (Schwartz and  
51 Koella 2001).

52         These “stage-dependent” behavioural alterations likely increase parasite transmission  
53 (Cator et al. 2014, Dobson 1988), provided that mosquito feeds are taken on a suitable vertebrate  
54 host species for the parasite. While malaria vectors can usually feed on a range of different  
55 vertebrate species (Takken and Verhulst 2013), the malaria parasites they transmit are often  
56 highly host-specific, infecting only one or a few vertebrate species (Perkins 2014). For example  
57 *P. falciparum*, which causes the most severe form of human malaria, displays an extreme form of  
58 specificity and can develop and reproduce in hominids only (predominantly in human and to a  
59 lesser extent in chimpanzee, bonobo, and gorilla) (Rayner et al. 2011, Prugnolle et al. 2011,  
60 Ngoubangoye et al. 2016), such that any mosquito bite on another vertebrate species would be a  
61 dead-end for the parasite. In contrast, the vectors of *P. falciparum* can feed on a wide range of  
62 vertebrate hosts species in the wild depending on the geographic area and the relative abundance  
63 of human and other vertebrates (Costantini et al. 1999, Takken and Verhulst 2013). Accordingly,

64 *P. falciparum* could modify its vector choice in ways that enhance transmission toward human  
65 and/or reduce mosquito attraction to other unsuitable host species (i.e. specific manipulation). A  
66 previous study testing this hypothesis found no effect of *P. falciparum* infection on host  
67 preference of three major vector species, *An. coluzzii*, *An. gambiae*, and *An. arabiensis* (Nguyen  
68 et al. 2017). However, this study examined the odour-mediated mosquito host preference in  
69 laboratory conditions using a Y-olfactometer, not the final realised host choice which is of  
70 primary importance for parasite transmission.

71 Here, we assessed the influence of *P. falciparum* on *An. coluzzii*, *An. gambiae* and *An.*  
72 *arabiensis* blood-feeding behaviour in three villages of Burkina Faso. First, inherent mosquito  
73 host preferences were determined using odor-baited traps, set side by side in a choice  
74 arrangement, releasing either human or calf odors. Patterns of host selection were then assessed  
75 by the identification of the blood meal origin of indoor-resting samples.

76

## 77 **Results**

78 *Anthropophily index* – To assess the inherent mosquito host preference of field populations of  
79 mosquitoes, we used two odour-baited entry traps (OBETs) and two odour-baited double net  
80 traps (BNTs) releasing either calf or human odours (Figure supplement S1). The anthropophily  
81 index (AI) was expressed as the number of *Anopheles gambiae s.l.* caught in the human-baited  
82 trap over the total number of mosquitoes caught in both human- and calf- baited traps. The  
83 infection status was successfully determined in 584 out of the 674 mosquitoes (86.6%) collected  
84 in the OBETs (383 individuals) and BNTs (201 individuals). Uninfected, oocyst-infected and  
85 sporozoite-infected females displayed similar host preferences ( $X^2_2 = 3.6$ ,  $P = 0.17$ , Figure  
86 supplement S2), with a significant attraction toward human odours (uninfected females:  $63.3 \pm$

87 4%, N=531, OR=0.58, 95% CI = 0.53-0.63, P <0.0001; oocyst-infected females:  $55.2 \pm 18$  %,  
88 N=29, OR=0.81, 95% CI = 0.56-0.81, P=0.58; sporozoite-infected females:  $45.8 \pm 20$  %; N=24,  
89 OR=1.18, 95% CI = 0.78-1.78, P=0.7). There was no effect of collection method on AI (OBETs:  
90  $64 \pm 5$  %, BNTs:  $59 \pm 7$  %;  $X^2_1 = 1.5$ , P = 0.21), indicating that both methods are comparable to  
91 assess mosquito host preference. There was no interaction between mosquito infection and  
92 collection method ( $X^2_2 = 0.26$ , P = 0.9; Figure supplement S2).

93

94 *Human blood index* – To assess the realized host selection of *Anopheles gambiae s.l.*, the blood  
95 meal origins of females collected indoors between 7 am and 9 am were identified. The human  
96 blood index (HBI) was expressed as the number of females fed on human (including mixed  
97 human-animal bloodmeals) over the total number of blood-fed females. Of the 3447 blood-fed  
98 *Anopheles gambiae s.l.* collected indoors, the blood meal origin was successfully identified in  
99 2627 samples (76%). Among these 2627 samples, infection status was successfully determined  
100 in 2328 mosquitoes (88.6%). The following analyses are restricted to these 2328 females. HBI  
101 was significantly affected by mosquito infection status ( $X^2_2 = 13.007$ , P = 0.0015; Figure 1) with  
102 a 24% increase in HBI in sporozoite-infected females compared to oocyst-infected and  
103 uninfected counterparts (sporozoite-infected:  $77 \pm 5.7$  %; N=209, deviation from random feeding:  
104 OR=0.3, 95% CI = 0.25-0.35, P <0.0001; oocyst-infected females:  $63.6 \pm 5.7$  %, N=118,  
105 OR=0.57, 95% CI = 0.47-0.69, P =0.004; uninfected females:  $61.1 \pm 2.1$  %; N=2001, OR=0.64,  
106 95% CI = 0.61-0.66, P <0.0001). HBI was also significantly influenced by shelter type ( $X^2_2 =$   
107  $145.92$ , P < 0.0001) and villages ( $X^2_2 = 139.5$ , P < 0.0001; see supplementary material for  
108 details). The HBI of sporozoite-infected mosquitoes was higher than that of oocyst-infected and  
109 uninfected females regardless of the village considered (infection status: village interaction:  $X^2_4$

110 = 2.3,  $P = 0.68$ , Figure 1) or the shelter type in which mosquito females were collected (infection  
111 status: shelter type interaction:  $X^2_4 = 0.7$ ,  $P = 0.95$ , Figure supplement S3).

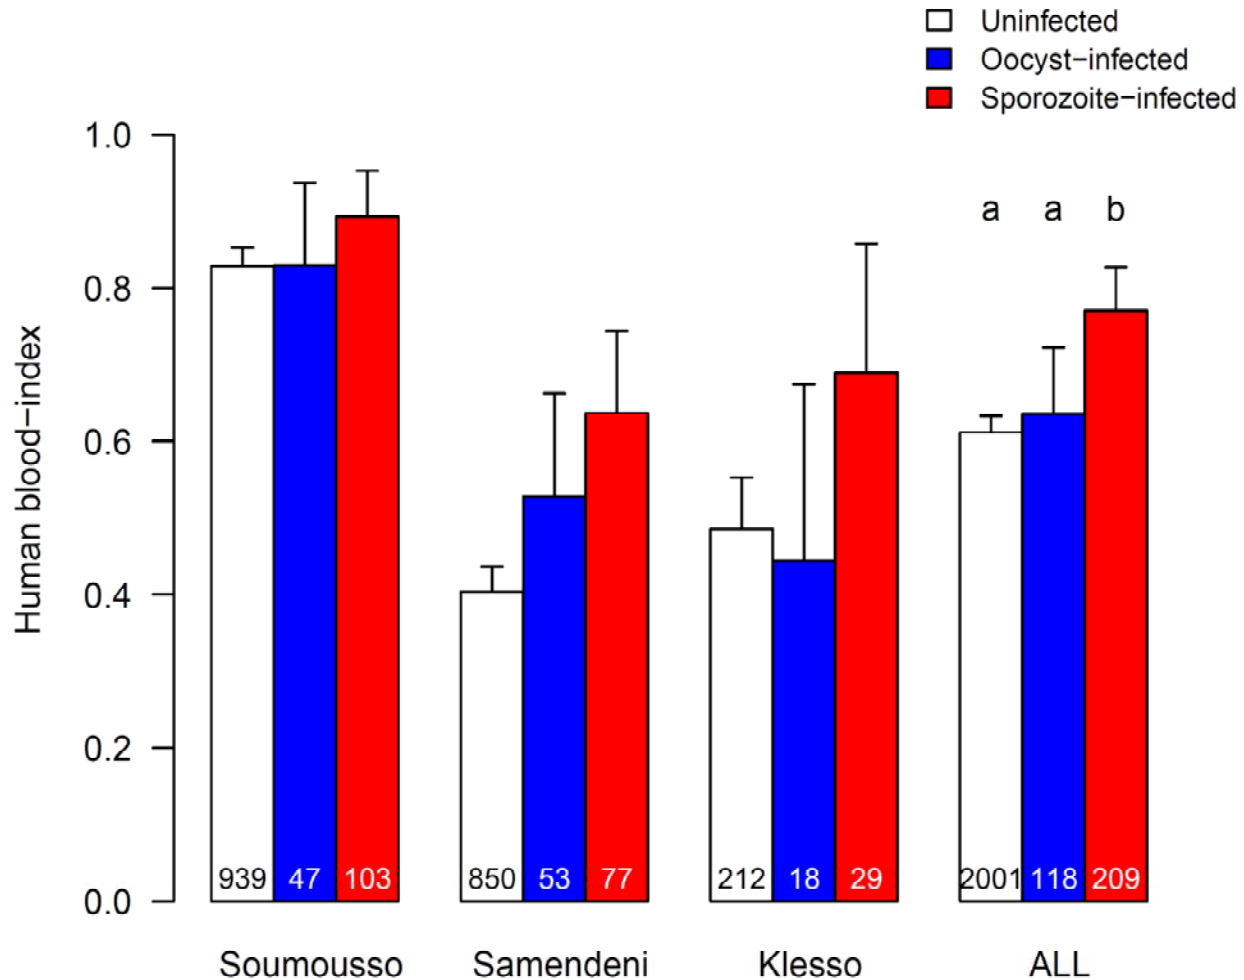

112  
113 **Figure 1.** Effect of infection status on the human-blood index of *Anopheles gambiae s. l.* females  
114 expressed as the number of females fed on human out of the total number of blood-fed females  
115 for the three sampled villages. Data show proportion  $\pm$  95% confidence interval. Numbers in bars  
116 indicate the total numbers of mosquitoes. Different letters indicate differences between infection  
117 status (Chi-square *post-hoc* tests: sporozoite-infected vs. oocyst-infected females  $X^2_1=6.1$ ,  
118  $P=0.013$ ; sporozoite-infected vs. uninfected females  $X^2_1=19.4$ ,  $P<0.0001$ ; oocyst-infected vs.  
119 uninfected females  $X^2_1=0.18$ ,  $P= 0.67$ ).

120

121 A significant species variation in HBI was observed ( $X^2_2 = 10.2$ ,  $P = 0.006$ ; Figure 2)  
122 with *Anopheles arabiensis* being significantly less anthropophagic ( $22.2 \pm 15\%$ ,  $N=27$ ,  $OR=3.5$ ,  
123  $95\% CI = 2.2-5.56$ ,  $P = 0.007$ ) than *An. gambiae* ( $54.8 \pm 7.1\%$ ;  $N=186$ ,  $OR=0.82$ ,  $95\% CI =$   
124  $0.71-0.95$ ,  $P = 0.19$  ) and *An. coluzzii* ( $55.1 \pm 6.8\%$ ;  $N=205$ ,  $OR=0.81$ ,  $95\% CI = 0.71-0.94$ ,  
125  $P=0.14$ ). Although HBI varied among mosquito species, sporozoite-infected individuals  
126 displayed highest anthropophagy regardless of the species considered (infection status: species  
127 interaction:  $X^2_4 = 4$ ,  $P = 0.42$ ; Figure 2 and supplementary material).

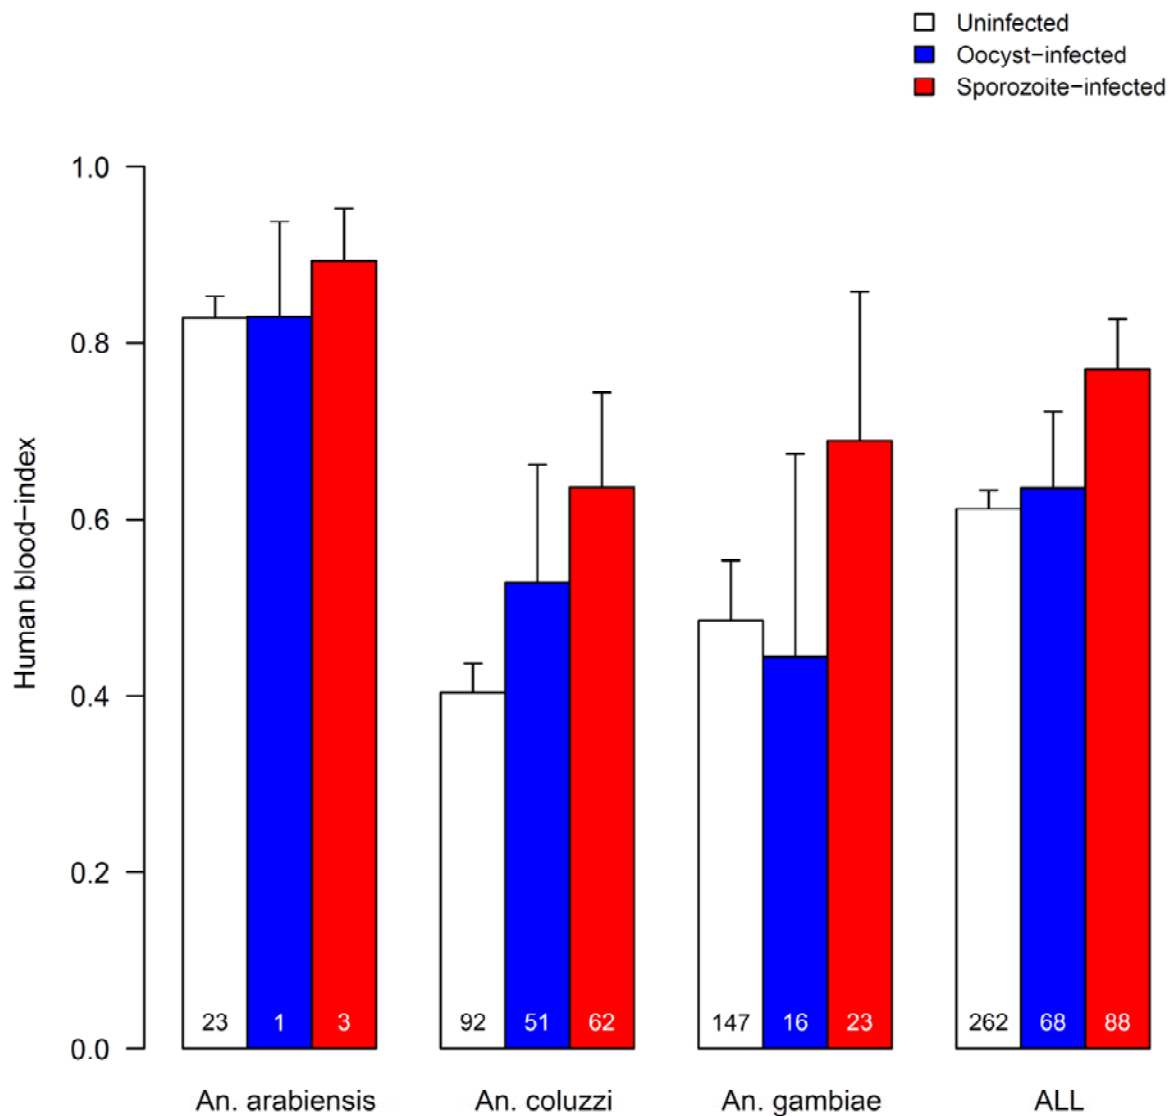

128  
129 **Figure 2.** Effect of infection status and *Anopheles* species *sensu stricto* on the human-blood  
130 index expressed as the proportion of females fed on human or human and animal out of the total  
131 of blood-fed females. Data show proportion  $\pm$  95% confidence interval. Numbers in bars indicate  
132 the total numbers of mosquitoes.  
133  
134 Finally, HBI was not significantly affected by parity (nulliparous females:  $49.53 \pm 9\%$ , parous  
135 females:  $45.6 \pm 7.5\%$ ;  $X^2_1 = 0.4$ ,  $P = 0.52$ ).



136 *Epidemiological consequences* – To investigate the epidemiological impact of a higher HBI in  
137 infectious females compared to oocyst-infected and uninfected females, we built a mathematical  
138 model based on the experimental values observed in this study. This model assessed the impact  
139 of different HBIs on the Entomological Inoculation Rate (EIR, number of infectious bites  
140 received by a person during one year) at different mosquito densities. The HBI of susceptible  
141 mosquito was fixed at 0.62 (as in uninfected and oocyst-infected mosquitoes) and the impact of  
142 HBI variation in infectious (sporozoite-infected) mosquitoes on parasite transmission potential  
143 was explored at different mosquito-to-human ratios (Figure 3). At a low ratio of 1 (1 mosquito  
144 per human), an HBI of infectious mosquitoes of 0.62 (similar to that of susceptible mosquitoes)  
145 resulted in an EIR of 17, while an HBI of 0.77 (as observed here in infectious mosquitoes)  
146 resulted in an EIR of 38. In other words, a 24% increase in HBI resulted in a 123% increase in  
147 EIR, everything else being equal. Transmission consequences are less striking when the human-  
148 to-mosquito ratios were higher (52 vs. 65 with a ratio of 10, i.e. a 25% increase in EIR; and 65  
149 vs. 71 with a ratio of 100, i.e. a 9% increase in EIR).

150

151

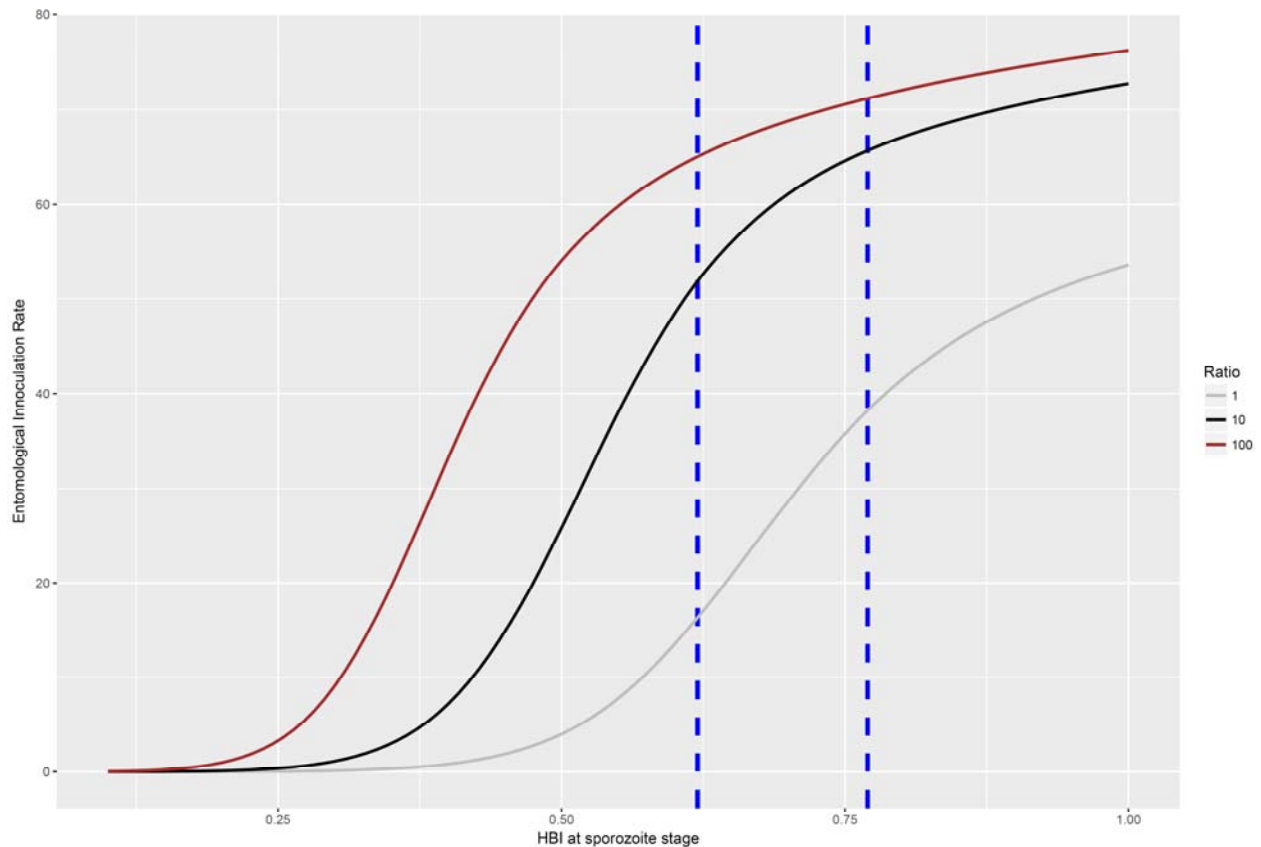

152

153 **Figure 3.** Expected epidemiological consequences of HBI variation. X axis represents the range  
154 of values considered for the HBI of infectious (sporozoite-infected) mosquitoes and the Y axis is  
155 the Entomological Inoculation Rate (EIR, number of infectious bites received by a person over  
156 one year) when the HBI of susceptible (uninfected and oocyst-infected) is 0.62. The plain lines  
157 show the evolution of EIR according to HBI of sporozoite infected mosquitoes for different  
158 values of mosquito-to-human ratio. The dashed lines represent the value considered for  
159 susceptible mosquitoes (0.62) and the value measure for sporozoite-infected mosquitoes (0.77).

160

## 161 Discussion

162 Consistent with the hypothesis of specific manipulation, the patterns of mosquito host selection  
163 showed that sporozoite-infected *An. coluzzi*, *An. gambiae* and *An. arabiensis* females were more

164 likely to have fed on human than oocyst-infected and uninfected individuals. By distinguishing  
165 sporozoite and oocyst infection, we ruled out the potential confounding effect of a mere intrinsic  
166 mosquito characteristic. Infected mosquitoes may indeed exhibit increased anthropophagy not  
167 because of being infected but just because of an innate preference for human, thus making these  
168 mosquito individuals infected (Lefèvre and Thomas 2008). The preference assays (OBETs and  
169 BNTs) showed that infected mosquitoes displayed similar long-range attraction toward human  
170 odour as uninfected individuals regardless of parasite developmental stages (oocyst vs  
171 sporozoite), confirming previous laboratory results (Nguyen et al. 2017).

172         The precise mechanisms responsible for increased anthropophagy in sporozoite-infected  
173 mosquitoes is not yet clear, but at least three hypotheses can be proposed. First, malaria parasites  
174 might manipulate mosquito short-range behaviours only, whereas at longer range when  
175 mosquitoes rely mainly on CO<sub>2</sub> and other volatile odours, sporozoite-infected mosquitoes display  
176 similar preference as uninfected and oocyst-infected individuals. At short range, mosquitoes rely  
177 on other cues including visual stimuli, moist, heat and skin emanations (Takken and Verhulst  
178 2013). These stimuli can be host-specific and inform of host suitability for parasite development  
179 before the mosquito engage in selection and eventually in feeding. In addition to a possible  
180 preferential short-range attraction of sporozoite-infected mosquitoes toward host species suitable  
181 for parasite development, there could also be short-range repellence by unsuitable host species.

182         Second, the parasite may induce changes in the vector such as an alteration of  
183 microhabitat choice to spatially match the habitat of the suitable host. This could be achieved  
184 through parasite manipulation of mosquito endophagic/philic behaviours resulting in a higher  
185 degree of indoor -feeding and -resting of sporozoite-infected females. For example, infectious  
186 mosquitoes may exhibit an enhanced tendency to enter house interstices regardless of emitted

187 odors. Such changes could also be mediated through a modification of mosquito phototactic  
188 response: while uninfected mosquitoes would respond normally causing the natural fraction of  
189 the population to leave the house following a blood-meal, infectious mosquitoes may display a  
190 negative phototactic response increasing their chances of staying inside human dwellings. Future  
191 experiments exploring the phototactic response of infected and uninfected mosquitoes would  
192 help addressing this hypothesis.

193 Third, the parasite may induce changes in the vector such as an alteration of time  
194 activity in order to temporally match the time rest or activity of the suitable host. Mosquitoes  
195 exhibit circadian rhythms in many activities such as flight, host-seeking, swarming, egg-laying,  
196 etc. There is mounting evidence that, following bed-nets introduction, malaria vectors can  
197 display increased tendency to feed outdoors (Russell et al. 2011) or bite earlier in the evening or  
198 later in the morning (Moiroux et al. 2012). Accordingly, *P. falciparum* could manipulate  
199 mosquito host-seeking rhythm in a way that increases bites on unprotected people. Testing this  
200 hypothesis would require sampling mosquitoes at distinct period and comparing the proportion  
201 of uninfected, oocyst-infected and sporozoite-infected vectors among samples.

202 *Plasmodium falciparum* takes about 10 to 18 days to complete its development  
203 (depending on temperature) (WHO manual 2014). Therefore, there is an increased likelihood of  
204 sporozoite infection as mosquitoes become older which means that mosquito age could be a  
205 confounding factor of infection. In other words, infected mosquitoes may display increased HBI  
206 not because they harbour sporozoites but because they are older. Such an age effect could be  
207 mediated by specific physiological requirements in old mosquitoes or by a positive  
208 reinforcement (learning / memory) of feeding on human. Our data does not support an age effect

209 as we did not find a significant effect of parity on HBI. However, parity is only a rough proxy of  
210 female age and more precise techniques are needed to firmly rule out the potential role of age.

211 Sporozoite-induced change in mosquito host selection occurred in three major and  
212 related mosquito vectors, namely *An. coluzzii*, *An. gambiae* and *An. arabiensis*. This suggests  
213 that manipulation likely already occurred in the common ancestor of these three species and that  
214 the parasites might exploit a physiological pathway common to all three mosquito species to  
215 modify its vector host choice.

216 Transmission models generally assume that uninfected and infected vectors have similar  
217 preference for human. This study suggests that this assumption may not be valid and that these  
218 models possibly underestimate transmission intensity. Our modelling approach confirms that  
219 HBI increase in infectious mosquitoes can have dramatic impact on disease transmission,  
220 especially when the mosquito-to-human ratio is low. At a ratio of 1, there was a 123% increase  
221 in transmission potential when the HBI of infectious mosquitoes was set similar to our  
222 experimental value. Operationally, this suggests that manipulation of vector host choice may  
223 boost parasite transmission during the early rainy season when mosquito density is still low and  
224 hence that control measures targeting old infectious females early in the transmission season  
225 would likely be efficient in limiting disease transmission.

226 In conclusion, our results suggest that the human malaria parasite *P. falciparum* evolved  
227 the ability to enhance transmission toward human, the appropriate host species, by increasing  
228 mosquito anthropophagy (or decreasing zoophagy) with potentially profound public health  
229 consequences. Future laboratory and field studies will be essential to confirm these results and to  
230 better understand the epidemiological, ecological and evolutionary consequences of parasite  
231 manipulation of vector behaviours.

232

## 233 **Material and methods**

### 234 *Collection sites*

235 The study was conducted in three villages of South-Western Burkina Faso: Soumouso  
236 (11°23'14"N, 4°24'42"W), Klesso (10°56'40.5"N, 3°59'09.9"W) and Samendeni  
237 (11°27'14.3"N, 4°27'37.6"W) (Figure supplement S4). The three villages are located in an area  
238 characterized by wooded savannah, where *Anopheles* females only have access to temporary,  
239 rain-filled puddles and quarries that permit larval development during the rainy season from June  
240 to November. The dry season extends from December to May. In these rural villages, domestic  
241 animals (including cattle, goats, sheep, pigs, chickens, donkeys, dogs) are usually kept in  
242 compounds in open conditions but a few households use separate roofed shelters for sheep,  
243 goats, pigs and chicken. Most houses are mud-walled with roofs of iron sheets or thatch, but a  
244 few houses are made of bricks.

### 245 *Field testing of host preference*

246 Two odour-baited entry traps (OBETs as in Lefèvre et al. 2009, Costantini et al. 1996, Costantini  
247 et al. 1998) and two odour-baited double net traps (BNTs as in Tangena et al. 2015) baited with  
248 calf and human odours were used to assess the host preference of field populations of mosquitoes  
249 in Samandeni and Klesso villages (Figure supplement S1). The two OBETs were connected to a  
250 tent (Lxlxh: 250x150x150 cm) by air vent hoses (Scanpart®, DxL=10\*300cm; Figure  
251 supplement S1a). The odours of the two hosts were drawn by a 12-V fan from the tents and into  
252 the OBETs by the air vent hoses, coming out of the traps at a speed of 15cm/s ( $\pm 2$ cm/s), as  
253 measured with a Testo 425-Compact Thermal Anemometer (Testo, Forbach, France) equipped  
254 with a hot wire probe [range: 0 to + 20m/s, accuracy:  $\pm (0.03 \text{ m/s} + 5\% \text{ of mv})$ ]. Host-seeking

255 mosquitoes responding to the host cues flew up the odour-laden streams and entered one of the  
256 two traps. The two odour-baited double net traps (BNTs) consisted of an untreated bed net  
257 (LxHx: 300x250x185 cm) from which each corner was raised 20 cm above ground and a smaller  
258 untreated bed net (LxHx: 190X120X150 cm) protecting the human volunteer in the human  
259 baited trap (Figure supplement S1b).

260 In both OBETs and BNTs, the human volunteers rested on a metal-framed bed (LxH:  
261 190x80 cm) and were protected from mosquito bites. OBETs and BNTs were operated from  
262 19:00 to 05:30 hours, for 3 nights in June 2013, and 13 nights in September 2013 in Samendeni.  
263 Only the BDNTs were set-up for 6 nights in September in Klesso. Trapped mosquitoes were  
264 retrieved in the morning using mouth aspirators. They were kept in a 20X20X20 cm cage with a  
265 humid towel on top and brought back to the laboratory for further processing (see below). OBETs  
266 and BNTs were operated from 19:00 to 05:30 hours. Trapped mosquitoes were retrieved in the  
267 morning using mouth aspirators, placed in a 20 x 20 x 20 cm cage with a humid towel on top,  
268 and brought back to the laboratory for further processing.

### 269 *Indoor resting mosquitoes sampling*

270 Indoor resting mosquitoes were collected between 7 am and 9 am by insecticide pyrethroid spray  
271 catches. All sample collections were carried out during the rainy and dry seasons for Soumouso  
272 village, whereas collections were only carried out in the rainy season for Samendeni and Klesso  
273 villages. Collections were carried out over 26 days between January and November 2009 in  
274 Soumouso, over 4 days in June 2013, and 13 days in September 2013 in Samendeni, and 6 days  
275 in September 2015 in Klesso. In Soumouso, human dwellings (from 10 neighbourhoods) only  
276 were sampled whereas animal sheds and unoccupied houses were also sampled in Samandeni  
277 and Klesso. A total of 27 human dwellings, 7 unoccupied houses and 20 animal sheds were

278 sampled in Samendeni. A total of 7 human dwellings, 7 unoccupied houses and 9 animal sheds  
279 were sampled in Klesso. All mosquitoes were kept in petri dish with a humid paper towel to  
280 facilitate later dissection and brought back to the laboratory for further processing (see below).

### 281 ***Laboratory processing of samples***

282 *Anopheles gambiae sl.* females were dissected in a drop of phosphate buffered saline (PBS) (pH  
283 7.2). Blood-fed midguts were gently squeezed to get the blood out, which was mixed with PBS,  
284 absorbed on a filter paper, and then kept at -20°C until identification by an enzyme-linked-  
285 immunosorbent assay (ELISA) for Soumouosso and Samendeni samples and by multiplex PCR as  
286 in Kent and Norris (2005) with minor modifications (see supplementary material) for Klesso  
287 samples. Each blood meal was discriminated between human, cattle, goat/sheep, chicken, dog,  
288 pig, and horse/donkey origins. The extracted midguts were then stained with 1% mercurochrome  
289 to detect with a microscope (20× magnification) the presence and number of *Plasmodium* spp.  
290 oocysts. PCR on a subset of oocyst-infected individuals confirmed that these oocysts belonged to  
291 *P. falciparum*. Head and thorax of individual mosquitoes were stored at -20°C in 1.5 mL  
292 Eppendorf tubes. Sporozoite infection with *P. falciparum* was determined by ELISA for the  
293 Soumouosso samples (Wirtz et al. 1987) and by qPCR for Samendeni and Klesso samples  
294 (Boissière et al. 2013).

295 This protocol allowed us to gather the following information for each collected individual  
296 mosquito: immature *Plasmodium* infection status (presence of oocysts in the midgut); mature *P.*  
297 *falciparum* infection status (presence of sporozoites in salivary glands); source of blood meal or  
298 trap (calf/human) chosen; shelter type (human dwellings, unoccupied houses, animal sheds). A  
299 total of 3447 blood-fed *Anopheles gambiae sl.* collected indoors and 674 females collected in  
300 the choice traps were processed. In addition, a subset of 276 females collected indoors was used



301 to determine parity (parous versus nulliparous) based on the condition of ovarian tracheoles.  
302 Similarly, a subset of 418 individuals was used to distinguish between the *Anopheles* species  
303 sensu stricto (*Anopheles arabiensis*, *Anopheles coluzzii* and *Anopheles gambiae*) using routine  
304 PCR-RFLP as described in Santolamazza *et al.* (2008).

305 A total of 3447 blood-fed *Anopheles gambiae s.l.* collected indoors and 674 females  
306 collected in the choice traps were processed. In addition, a subset of 276 females collected  
307 indoors was used to determine parity (parous versus nulliparous) based on the condition of  
308 ovarian tracheoles. A subset of 418 individuals was used to distinguish *Anopheles arabiensis*,  
309 *Anopheles coluzzii* and *Anopheles gambiae* using routine PCR-RFLP as described in (2008).

### 310 ***Statistical analyses***

311 The anthropophily index (AI) was expressed as the number of *Anopheles gambiae s.l.* caught in  
312 the human-baited trap over the total number of mosquitoes caught in both human- and calf-  
313 baited traps. We tested the effect of infection status, collection method (OBET vs. BNT), and  
314 their interaction on AI using a general linear model (GLM) with a binomial error structure.

315 The human blood index (HBI) was expressed as the number of *Anopheles gambiae s.l.* fed  
316 on human including mixed human-animal bloodmeals over the total number of blood-fed  
317 *Anopheles gambiae s.l.* We tested the effect of *Plasmodium* infection status (uninfected, oocyst-  
318 infected, sporozoite-infected individuals - 25 individuals with both oocysts and sporozoites were  
319 included in the sporozoite infected group and excluding these individuals from the analysis  
320 yielded similar results), village (Soumouso, Samendeni, Klesso), shelter type (human dwelling,  
321 unoccupied house, animal shed) and relevant two-ways interactions (infection status by shelter  
322 type and infection status by village) on HBI using a general linear model (GLM) with a binomial  
323 error structure. The effect of species (*Anopheles gambiae*, *An. coluzzii* and *An. arabiensis*),

324 infection status, shelter type, and their interactions on HBI was assessed using the subset of  
325 females identified to the molecular level using a GLM with a binomial error structure. The effect  
326 of parity (nulliparous vs. parous) on HBI was assessed on a subset of females using a GLM with  
327 a binomial error structure.

328 We also verified for both AI and HBI whether choice significantly differed from a random  
329 distribution between humans and animals or whether mosquitoes displayed a statistically  
330 significant attraction to one type of blood meal or trap.

331 For model selection, we used the stepwise removal of terms, followed by likelihood ratio  
332 tests (LRT). Term removals that significantly reduced explanatory power ( $P < 0.05$ ) were retained  
333 in the minimal adequate model (Crawley 2007). All analyses were performed in R v.3.0.3.

### 334 ***Mathematical model***

335 In order to explore the epidemiological consequences of such variation in HBI, we built a SIR  
336 model (Keeling and Rohani 2008):

337

$$\frac{dS_m}{dt} = \mu N_m - ab \frac{S_m}{N_m} I_h \varepsilon_s - \mu S_m$$

$$\frac{dE_m}{dt} = ab \frac{S_m}{N_m} I_h \varepsilon_s - (\mu + \gamma)$$

$$\frac{dI_m}{dt} = \gamma E_m - \mu I_m$$

$$\frac{dS_h}{dt} = -ac \frac{S_h}{N_h} I_m \varepsilon_i + \delta$$

$$\frac{dI_h}{dt} = ac \frac{S_h}{N_h} I_m \varepsilon_i - \delta$$

338 Susceptible mosquitoes ( $S_m$ ) born at rate  $\mu$  and become exposed ( $E_m$ ) according to their biting  
339 rate ( $a$ ), their probability to get infected ( $b$ ) and the HBI of susceptible mosquitoes ( $\varepsilon_s$ ). Then,

340 exposed mosquitoes become infectious ( $I_m$ ) according to their extrinsic incubation period ( $\gamma$ ).  
341 Each mosquito population die at rate ( $\mu$ ). Susceptible humans ( $S_h$ ) get infected according to  
342 mosquito biting rate, probability to develop infection ( $c$ ) and HBI of infectious mosquitoes ( $\epsilon_i$ ).  
343 Then, infectious humans remain infectious ( $I_m$ ) during their infectious period equals to  $1/\delta$  on  
344 average.  
345 See parameters values in table supplement S1. We have fixed HBI of susceptible mosquitoes ( $\epsilon_s$ )  
346 to the value that has been experimentally measured in this study and we explored the impact of  
347 HBI of infectious mosquitoes ( $\epsilon_i$ , during the sporozoite stage) on the Entomological Inoculation  
348 Rate (EIR, representing the number of infectious bites received by a human during one year  
349 (Smith and Ellis McKenzie 2004), as defined by:

$$EIR = ma \frac{I_h}{N_h}$$

350 where  $m$  is the ratio between mosquitoes and humans, and other parameters are similar as above.  
351 We assumed different ratios ( $m$ ) between mosquitoes and humans (low:  $m=1$ , medium:  $m=10$   
352 and high:  $m=100$ ) to explore the impact of different HBIs on the EIR in relation to mosquito  
353 densities.

### 354 ***Ethics***

355 Ethical approval was obtained from the Centre Muraz Institutional Ethics Committee under  
356 agreement no. 0003-2009/CE-CM and A0003-2012/CE-CM.

357

### 358 **Acknowledgements**

359 We would like to thank all volunteers for participating in this study as well as the local  
360 authorities for their support. We are very grateful to the IRSS staff in Burkina Faso for technical  
361 assistance.

362

### 363 **Competing interests**

364 We have no competing interests.

365

### 366 **Funding**

367 This study was supported by the ANR grant no. 11-PDOC-006-01 and the European  
368 Community's Seventh Framework Program (FP7/2007–2013) under grant agreements no.  
369 242095 and no.223736. BR is supported by the ANR project PANIC.

370

### 371 **References**

372 Anderson RA, Koella JC, and Hurd H. 1999. The effect of *Plasmodium yoelii nigeriensis*  
373 infection on the feeding persistence of *Anopheles stephensi* Liston throughout the  
374 sporogonic cycle. *Proc R Soc B* **266**:1729-1733.

375 Batista E, Costa E, and Silva A. 2014. *Anopheles darlingi* (Diptera: Culicidae) displays increased  
376 attractiveness to infected individuals with *Plasmodium vivax* gametocytes. *Parasite*  
377 *Vector* **7**:251.

378 Boissière A, Gimonneau G, Tchioffo MT, Abate L, Bayibeki A, Awono-Ambéné PH, Nsango  
379 SE, and Morlais I. 2013. Application of a qPCR assay in the investigation of  
380 susceptibility to malaria infection of the M and S molecular forms of *An. gambiae* s.s. in  
381 Cameroon. *PLoS ONE* **8**:e54820.

382 Busula A, Bousema T, Mweresa C, Masiga D, Logan J, Sauerwein R, Verhulst N, Takken W,  
383 and de Boer J. 2017. Gametocytemia and Attractiveness of *Plasmodium falciparum*-  
384 Infected Kenyan Children to *Anopheles gambiae* Mosquitoes. *J Infect Dis* **216**: 291-295.

- 385 Cator L, Lynch P, Thomas M, and Read A. 2014. Alterations in mosquito behaviour by malaria  
386 parasites: potential impact on force of infection. *Malar J* **13**:164.
- 387 Cator LJ, George J, Blanford S, Murdock CC, Baker TC, Read AF, and Thomas MB. 2013.  
388 'Manipulation' without the parasite: altered feeding behaviour of mosquitoes is not  
389 dependent on infection with malaria parasites. *Proc R Soc B* **280**:20130711. doi:  
390 10.1098/rspb.2013.0711.
- 391 Cator LJ, Lynch PA, Read AF, and Thomas MB. 2012. Do malaria parasites manipulate  
392 mosquitoes? *Trends Parasitol* **28**:466-470.
- 393 Cornet S, Nicot A, Rivero A, and Gandon S. 2013. Malaria infection increases bird attractiveness  
394 to uninfected mosquitoes. *Ecol Lett* **16**:323-329. doi: 10.1111/ele.12041.
- 395 Costantini C, Gibson G, Sagnon N, Della Torre A, Brady J, and Coluzzi M. 1996. Mosquito  
396 responses to carbon dioxide in a west African Sudan savanna village. *Med Vet Entomol*  
397 **10**:220-7.
- 398 Costantini C, Sagnon N, Della Tori A, Diallo M, Brady J, Gibson G, and Coluzzi M. 1998.  
399 Odor-mediated host preferences of West African mosquitoes, with particular reference to  
400 malaria vectors. *Am J Trop Med Hyg* **58**:56-63.
- 401 Costantini C, Sagnon N, della Torre A, and Coluzzi M. 1999. Mosquito behavioural aspects of  
402 vector-human interactions in the *Anopheles gambiae* complex. *Parassitologia* **41**:209-  
403 17.
- 404 Crawley MJ. 2007. *The R book*. The Atrium, Southern Gate, Chichester, West Sussex PO19  
405 8SQ, England: John Wiley & Sons Ltd.

- 406 De Moraes CM, Stanczyk NM, Betz HS, Pulido H, Sim DG, Read AF, and Mescher MC. 2014.  
407 Malaria-induced changes in host odors enhance mosquito attraction. *Pro Natl Acad Sci*  
408 **111**:11079-11084. doi: 10.1073/pnas.1405617111.
- 409 Dobson AP. 1988. The population biology of parasite-induced changes in host behavior. *Q Rev*  
410 *Biol* **63**:139-165.
- 411 Emami SN, Lindberg BG, Hua S, Hill S, Mozuraitis R, Lehmann P, Birgersson G, Borg-Karlson  
412 A-K, Ignell R, and Faye I. 2017. A key malaria metabolite modulates vector blood  
413 seeking, feeding, and susceptibility to infection. *Science* **355**: 1076-1080. doi:  
414 10.1126/science.aah4563.
- 415 Hurd H. 2003. Manipulation of medically important insect vectors by their parasites. *Annu Rev*  
416 *Entomol* **48**:141-161. doi: 10.1146/annurev.ento.48.091801.112722.
- 417 Keeling MJ, and Rohani P. 2008. *Modeling Infectious Diseases*. Princeton: Princeton University  
418 Press.
- 419 Kent RJ, and Norris DE. 2005. Identification of mammalian blood meals in mosquitoes by a  
420 multiplexed polymerase chain reaction targeting cytochrome B. *Am J Trop Med Hyg*  
421 **73**:336-42.
- 422 Koella JC. 2005. Malaria as a manipulator. *Behavioural Processes* **68**:271-273. doi:  
423 [10.1016/j.beproc.2004.10.004](https://doi.org/10.1016/j.beproc.2004.10.004).
- 424 Koella JC, and Packer MJ. 1996. Malaria parasites enhance blood-feeding of their naturally  
425 infected vector *Anopheles punctulatus*. *Parasitology* **113**:105-109.
- 426 Koella JC, Rieu L, and Paul REL. 2002. Stage-specific manipulation of a mosquito's host-  
427 seeking behavior by the malaria parasite *Plasmodium gallinaceum*. *Behavioral Ecology*  
428 **13**:816-820. doi: 10.1093/beheco/13.6.816.

- 429 Koella JC, Sorensen FL, and Anderson RA. 1998. The malaria parasite, *Plasmodium falciparum*,  
430 increases the frequency of multiple feeding of its mosquito vector, *Anopheles gambiae*.  
431 *Proc R Soc B* **265**:763-768.
- 432 Lacroix R, Mukabana WR, Gouagna LC, and Koella JC. 2005. Malaria infection increases  
433 attractiveness of humans to mosquitoes. *Plos Biology* **3**:1590-1593. doi:  
434 e29810.1371/journal.pbio.0030298.
- 435 Lefèvre T, Gouagna LC, Dabire RK, Elguero E, Fontenille D, Renaud F, Costantini C, and  
436 Thomas F. 2009. Beyond nature and nurture: phenotypic plasticity in blood-feeding  
437 behavior of *Anopheles gambiae* s.s. When humans are not readily accessible. *Am J Trop*  
438 *Med Hyg* **81**:1023-1029. doi: 10.4269/ajtmh.2009.09-0124.
- 439 Lefèvre T, and Thomas F. 2008. Behind the scene, something else is pulling the strings:  
440 Emphasizing parasitic manipulation in vector-borne diseases. *Infect Genet Evol* **8**:504-  
441 519. doi: 10.1016/j.meegid.2007.05.008.
- 442 Moiroux N, Gomez MB, Pennetier C, Elanga E, Djenontin A, Chandre F, Djegbe I, Guis H, and  
443 Corbel V. 2012. Changes in *Anopheles funestus* biting behavior following universal  
444 coverage of long-lasting insecticidal nets in Benin. *J Infect Dis* **206**:1622-1629. doi:  
445 10.1093/infdis/jis565.
- 446 Ngoubangoye B, Boundenga L, Arnathau C, Mombo IM, Durand P, Tsoumbou T-A, Otoro BV,  
447 Sana R, Okouga A-P, Moukodoum N, Willaume E, Herbert A, Fouchet D, Rougeron V,  
448 Bâ CT, Ollomo B, Paupy C, Leroy EM, Renaud F, Pontier D, and Prugnolle F. 2016. The  
449 host specificity of ape malaria parasites can be broken in confined environments. *Int J*  
450 *Parasitol* **46**:737-744. doi: <http://dx.doi.org/10.1016/j.ijpara.2016.06.004>.

- 451 Nguyen PL, Vantaux A, Hien DF, Dabiré KR, Yameogo BK, Gouagna L-C, Fontenille D,  
452 Renaud F, Simard F, Costantini C, Thomas F, Cohuet A, and Lefèvre T. 2017. No  
453 evidence for manipulation of *Anopheles gambiae*, *An. coluzzii* and *An. arabiensis* host  
454 preference by *Plasmodium falciparum*. *Sci rep* **7**:9415. doi: 10.1038/s41598-017-09821-  
455 x.
- 456 Perkins SL. 2014. Malaria's many mates: past, present, and future of the systematics of the order  
457 Haemosporida. *J Parasitol* **100**:11-25. doi: 10.1645/13-362.1.
- 458 Prugnolle F, Durand P, Ollomo B, Duval L, Ariey F, Arnathau C, Gonzalez J-P, Leroy E, and  
459 Renaud F. 2011. A fresh look at the origin of *Plasmodium falciparum*, the most  
460 malignant malaria agent. *PLoS Pathog* **7**:e1001283. doi: 10.1371/journal.ppat.1001283.
- 461 Rayner JC, Liu W, Peeters M, Sharp PM, and Hahn BH. 2011. A plethora of *Plasmodium*  
462 species in wild apes: a source of human infection? *Trends Parasitol* **27**:222-9. doi:  
463 10.1016/j.pt.2011.01.006.
- 464 Rossignol PA, Ribeiro JMC, and Spielman A. 1984. Increased intradermal probing time in  
465 sporozoite-infected mosquitoes. *Am J Trop Med Hyg* **33**:17-20.
- 466 Rossignol PA, Ribeiro JMC, and Spielman A. 1986. Increased biting rate and reduced fertility in  
467 sporozoite-infected mosquitoes. *Am J Trop Med Hyg* **35**:277-279.
- 468 Russell TL, Govella NJ, Azizi S, Drakeley CJ, Kachur SP, and Killeen GF. 2011. Increased  
469 proportions of outdoor feeding among residual malaria vector populations following  
470 increased use of insecticide-treated nets in rural Tanzania. *Malar J* **10**:80. doi:  
471 10.1186/1475-2875-10-80.



- 472 Santolamazza F, Mancini E, Simard F, Qi Y, Tu Z, and della Torre A. 2008. Insertion  
473 polymorphisms of SINE200 retrotransposons within speciation islands of *Anopheles*  
474 *gambiae* molecular forms. *Malar J* **7**:163.
- 475 Schwartz A, and Koella JC. 2001. Trade-offs, conflicts of interest and manipulation in  
476 *Plasmodium*-mosquito interactions. *Trends Parasitol* **17**:189-194. doi: 10.1016/s1471-  
477 4922(00)01945-0.
- 478 Smallegange RC, van Gemert G-J, van de Vegte-Bolmer M, Gezan S, Takken W, Sauerwein  
479 RW, and Logan JG. 2013. Malaria infected mosquitoes express enhanced attraction to  
480 human odor. *PLoS ONE* **8**:e63602.
- 481 Smith D, and Ellis McKenzie F. 2004. Statics and dynamics of malaria infection in *Anopheles*  
482 mosquitoes. *Malar J* **3**:13.
- 483 Stanczyk NM, Mescher MC, and De Moraes CM. 2017. Effects of malaria infection on mosquito  
484 olfaction and behavior: extrapolating data to the field. *Curr Opin Insect Sci* **20**:7-12. doi:  
485 [10.1016/j.cois.2017.02.002](https://doi.org/10.1016/j.cois.2017.02.002).
- 486 Takken W, and Verhulst NO. 2013. Host preferences of blood-feeding mosquitoes. *Annu Rev*  
487 *Entomol* **58**:433-453.
- 488 Tangena J-AA, Thammavong P, Hiscox A, Lindsay SW, and Brey PT. 2015. The Human-Baited  
489 Double Net Trap: An Alternative to Human Landing Catches for Collecting Outdoor  
490 Biting Mosquitoes in Lao PDR. *PLoS ONE* **10**:e0138735. doi:  
491 10.1371/journal.pone.0138735.
- 492 Wekesa JW, Copeland RS, and Mwangi RW. 1992. Effect of *Plasmodium falciparum* on blood  
493 feeding-behavior of naturally infected *Anopheles* mosquitoes in Western Kenya. *Am J*  
494 *Trop Med Hyg* **47**:484-488.

- 495 WHO manual. 2014. MR4-methods in Anopheles research Fourth edition.
- 496 Wirtz RA, Zavala F, Charoenvit Y, Campbell GH, Burkot TR, Schneider I, Esser KM, Beaudoin  
497 RL, and Andre RG. 1987. Comparative testing of monoclonal antibodies against  
498 *Plasmodium falciparum* sporozoites for ELISA development. *Bull World Health Organ*  
499 **65**:39-45.
- 500

## Supplementary Material

### Field evidence for manipulation of mosquito host selection by the human malaria parasite, *Plasmodium falciparum*

Amélie Vantaux, Franck Yao, Domonbabele FdS Hien, Edwige Guissou, Bienvenue K. Yameogo, Louis-Clément Gouagna, Didier Fontenille, François Renaud, Frédéric Simard, Carlo Costantini, Frédéric Thomas, Karine Mouline, Benjamin Roche, Anna Cohuet, Kounobor R. Dabiré, Thierry Lefèvre

#### Supplementary Results:

HBI was also significantly influenced by shelter type ( $X^2_2 = 145.92$ ,  $P < 0.0001$ ). Females collected in animal sheds were significantly less likely to have fed on human host ( $22.3 \pm 4\%$ ) than females collected in unoccupied houses ( $40.9 \pm 6.8\%$ ; Chi-square post-hoc test:  $X^2_1 = 21.6$ ,  $P < 0.0001$ ) or in human dwellings ( $74.5 \pm 2\%$ ; Chi-square post-hoc test:  $X^2_1 = 385$ ,  $P < 0.0001$ ). Females collected in human dwellings were also significantly more likely to have fed on human host than females collected in unoccupied houses (Chi-square post-hoc test:  $X^2_1 = 96$ ,  $P < 0.0001$ ). HBI was significantly affected by the village ( $X^2_2 = 139.5$ ,  $P < 0.0001$ ). However, in Soumouso human dwellings only were sampled confounding the effect of village and shelter type in this case. Therefore, we carried out an analysis on the human dwellings only to compare HBIs in the three villages. Mosquitoes were significantly less anthropophagic in Samendeni ( $56.5 \pm 4\%$ ), compared to Soumouso ( $83.5 \pm 2.2\%$ ; Chi-square test:  $X^2_1 = 138.8$ ,  $P < 0.0001$ ) and Klesso ( $77.3 \pm 9\%$ ; Chi-square test:  $X^2_1 = 12.7$ ,  $P = 0.0004$ ). HBIs in Soumouso and Klesso were not significantly different ( $83.5 \pm 2.2\%$  vs.  $77.3 \pm 9\%$  respectively; Chi-square test:  $X^2_1 = 1.8$ ,  $P = 0.18$ ).

#### *Species subset*

HBI was significantly affected by mosquito infection status ( $X^2_2 = 8.5$ ,  $P = 0.014$ ) with sporozoite-infected females being significantly more anthropophagic ( $71.6 \pm 9.4\%$ ) than oocyst-infected females ( $50 \pm 11.9\%$ ; Chi-square post-hoc tests:  $X^2_1 = 6.7$ ,  $P = 0.0096$ ) and

uninfected females ( $47.3 \pm 6\%$ ; Chi-square post-hoc tests:  $X^2_1 = 14.6$ ,  $P = 0.0001$ ). There was no significant differences between oocyst-infected and uninfected females (Chi-square post-hoc test:  $X^2_1 = 0.07$ ,  $P = 0.8$ ). HBI was significantly affected by the shelter type ( $X^2_2 = 50.8$ ,  $P < 0.0001$ ). In particular, the HBI in human dwellings females ( $73.7 \pm 6.3\%$ ) was significantly higher than the HBI in unoccupied houses ( $34.7 \pm 9.4\%$ ; Chi-square post-hoc tests:  $X^2_1 = 39$ ,  $P < 0.0001$ ) and animal sheds ( $37.3 \pm 8.2\%$ ;  $X^2_1 = 40.1$ ,  $P < 0.0001$ ). The HBIs of unoccupied houses and animal sheds were not significantly different (Chi-square post-hoc test:  $X^2_1 = 0.07$ ,  $P = 0.8$ ). There was no significant interactions (infection status\*shelter type:  $X^2_4 = 2.4$ ,  $P = 0.66$ ; shelter types\*species:  $X^2_4 = 2.3$ ,  $P = 0.67$ ; three-way interaction:  $X^2_5 = 8$ ,  $P = 0.15$ ).

### **Supplementary Material and methods:**

PCR-based determination of the females' blood meals origin targeting the vertebrate host cytochrome B has been performed as described by Kent and Norris, 2005, with the following modifications: (i) Three more primers were designed from available Genbank sequences to target the following potential hosts: chicken470F (Genbank accession number: AB044986.1), sheep695F (KY662385.1), donkey574F (FJ428520.1). (ii) For each individual, two multiplex reactions were performed to avoid cross-reactions between primers and to optimize the determination. In the multiplex reaction #1, UNREV1025, Chicken470F, Sheep695F, Goat894F and Donkey574F primers were used at an amplification temperature of  $49.2^\circ\text{C}$ . In the multiplex reaction #2, UNREV1025, Dog368F, Human741F, Cow121F and Pig573F primers were used at an amplification temperature of  $58^\circ\text{C}$ . Blood meal origin diagnostic was based on the PCR products expected sizes as follow: donkey (460bp), sheep (340bp), chicken (290bp), goat (150bp), dog (680bp), cow (561bp), pig (453bp), human (334bp).

## Supplementary Table

**Table S1:** Parameters used in the mathematical model.

| Parameter                                                  | Unit       | Value    |
|------------------------------------------------------------|------------|----------|
| $a$ (biting frequency)                                     | days.ind-1 | 4        |
| $b$ (mosquito probability to get infected)                 | %          | 0.5      |
| $\epsilon_s$ (human biting rate of susceptible mosquitoes) | %          | 0.62     |
| $\gamma$ (extrinsic incubation period)                     | days.ind-1 | 14       |
| $\mu$ (mosquito population dying rate)                     | days.ind-1 | 30       |
| $c$ (human probability to develop infection)               | %          | 0.5      |
| $\epsilon_i$ (human biting rate of infectious mosquitoes)  | %          | variable |
| $1/\delta$ (human infectious period)                       | day        | 30       |

## Supplementary figures

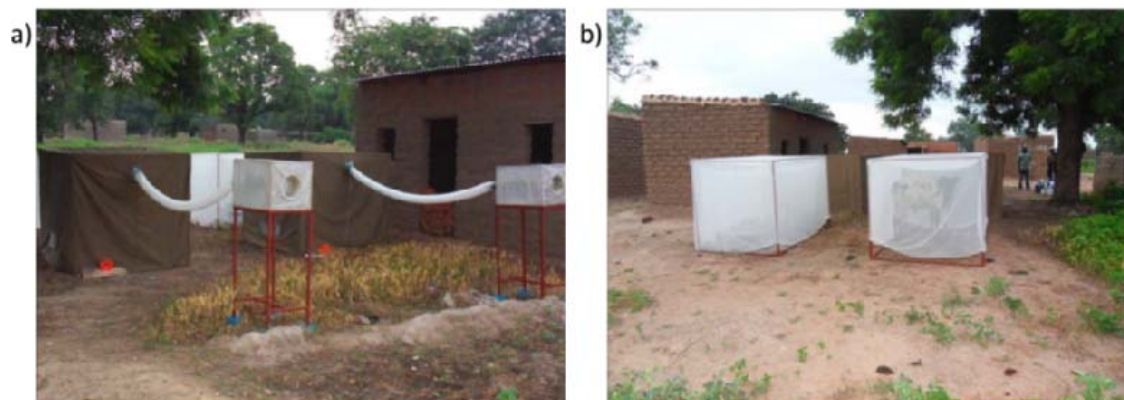

**Figure S1.** Traps baited with calf and human odours used to assess the host preference of field populations of mosquitoes in Samandeni and Klesso villages. **a)** Two odor-baited entry traps (OBETs) were connected to a tent by air vent hoses. **b)** Two odor-baited double net traps (BNTs).

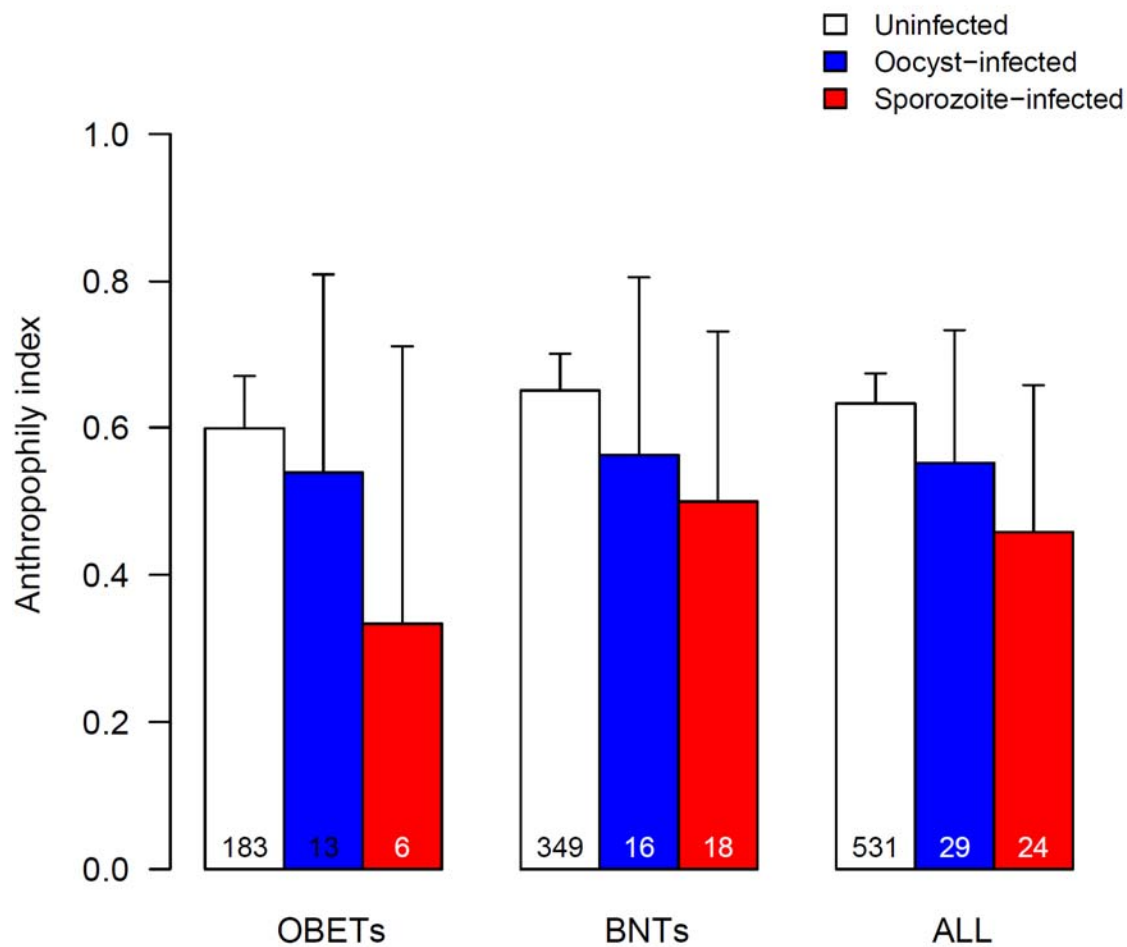

**Figure S2.** Effect of infection status on the anthropophily index of *Anopheles gambiae s. l.* females expressed as the proportion of females caught in the human-baited traps out of the total number retrieved from both human- and calf- baited traps. Data show proportion  $\pm$  95% confidence interval. Numbers in bars indicate the total numbers of mosquitoes in both traps.

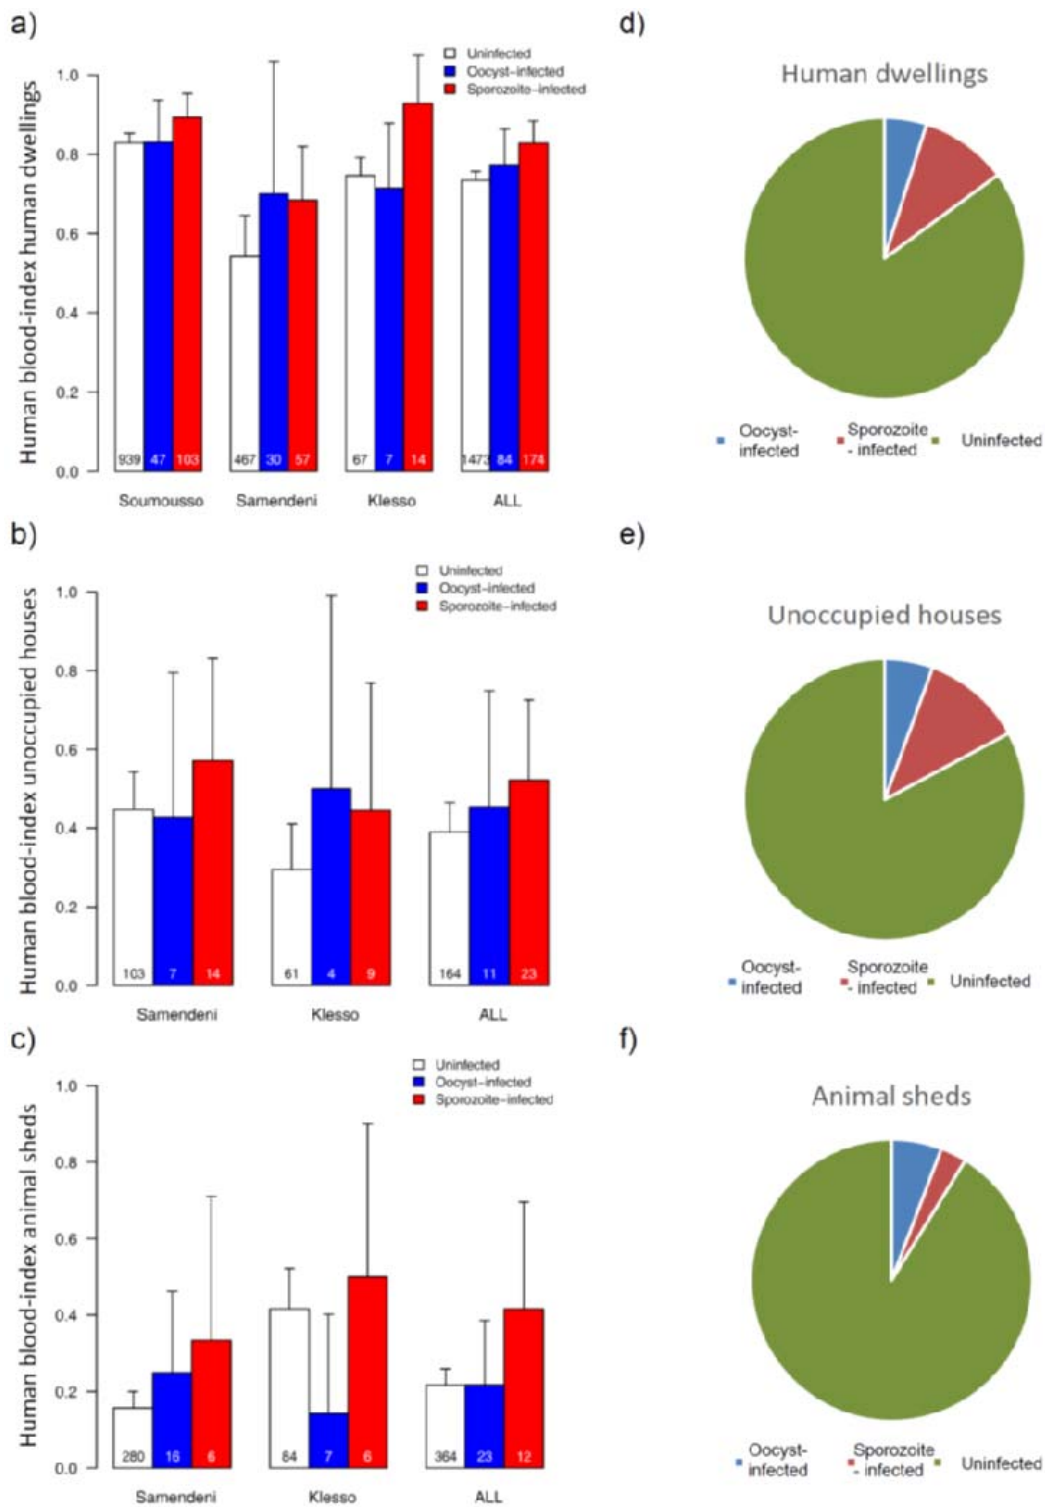

**Figure S3.** Effect of infection status on the human-blood index of *Anopheles gambiae s. l.* females expressed as the number of females fed on human or human-animal mixed blood meal over the total number of blood-fed females in the different villages samples in a) human



dwellings, b) unoccupied houses and c) animal sheds. Data show proportion  $\pm$  95% confidence interval. Numbers in bars indicate the total numbers of mosquitoes in both traps. Relative proportions of females according to their infection status in d) human dwellings, e) unoccupied houses and f) animal sheds.

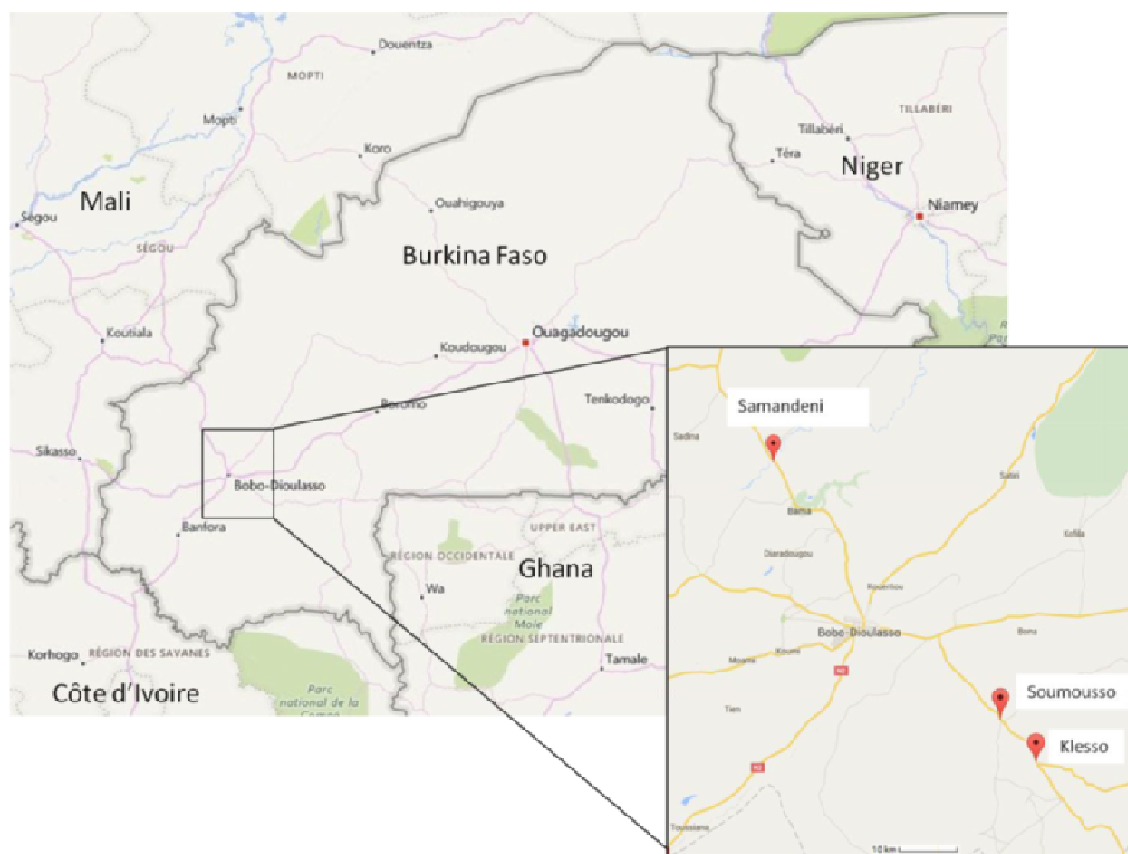

**Figure S4.** Study collection sites: Soumoussou (11°23'14"N, 4°24'42"W), Klesso (10°56'40.5"N, 3°59'09.9"W), Samandeni (11°27'14.3"N, 4°27'37.6"W)
